# Supplementary material
Source: PubMed Central journal article supplement (PMC4542002)
Supplement: NIHMS715673-supplement-figure.pdf [file NIHMS715673-supplement-figure.pdf]

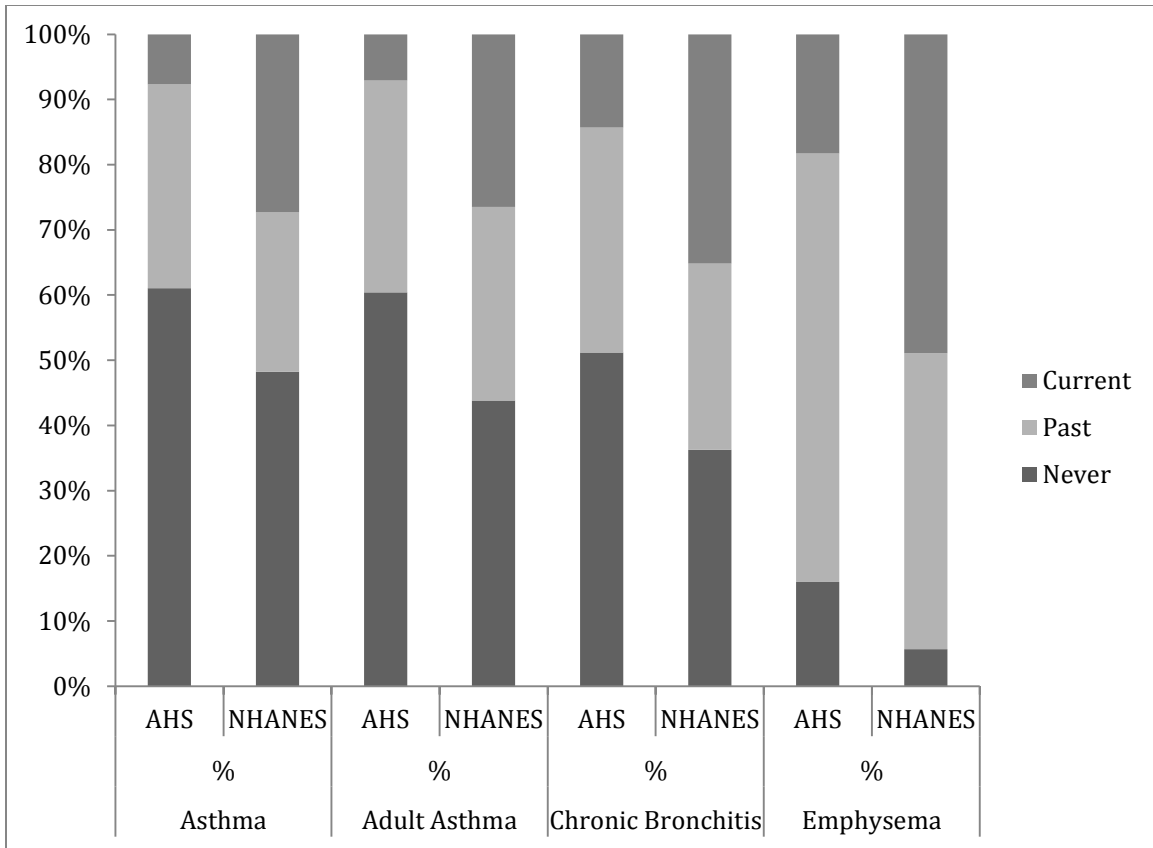

**Supplemental Figure** Distribution of Smoking History among those with respiratory disease in the AHS and NHANES
